# Supplementary material for: Impact of Comorbidities of Patients with Psoriasis on Phototherapy Responses
Source: MDPI journal article supplement (doi:10.3390/ijms23179508), 2022-08-23
Supplement: s1 [file s1]

**Table S1: Control and psoriatic patient groups used in this study.**

|                  |             | Control group | Psoriasis group |
|------------------|-------------|---------------|-----------------|
| Gender           | Men         | 49            | 101             |
|                  | Women       | 51            | 99              |
|                  | Total       | 100           | 200             |
| Age              | 18-39 years | 26            | 44              |
|                  | 40-59 years | 39            | 111             |
|                  | > 60 years  | 35            | 45              |
| Phototherapy     | UVA         | No            | 85              |
|                  | PUVA        | No            | 36              |
|                  | UVBBE       | No            | 29              |
|                  | UVA + UVBBE | No            | 50              |
| Blood test       |             | < 12 months   | < 12 months     |
| Informed consent |             | Yes           | Yes             |

**Table S2.** Compounds used in this study.

| Compound         | Concentrations | Commercial branch | Catalog number | Target                         |
|------------------|----------------|-------------------|----------------|--------------------------------|
| WZB117           | 0.1 $\mu$ M    | Selleckchem       | S7927          | GLUT1                          |
|                  | 1 $\mu$ M      |                   |                |                                |
|                  | 10 $\mu$ M     |                   |                |                                |
| ATRA             | 1 $\mu$ M      | Sigma-Aldrich     | R2625          | Retinoic acid receptors (RARs) |
| Galactose        | 25 mM          | Sigma-Aldrich     | G5388          | N/A                            |
| Glucose          | 25 mM          | Sigma-Aldrich     | G7021          | N/A                            |
| NAD <sup>+</sup> | 1 mM           | Sigma-Aldrich     | N3014          | N/A                            |
